# Supplementary material
Source: ML conference proceedings conference paper supplement (https://openaccess.thecvf.com/content/WACV2021/html/Tsutsui_Whose_Hand_Is_WACV_2021_paper.html)
Supplement: Supplementary file 1 [file Tsutsui_Whose_Hand_Is_WACV_2021_supplemental.pdf]

## 6. Supplementary Material

### 6.1. Subject Recognition Accuracy per Gesture

| Label Index | Accuracy | Label Index | Accuracy |
|-------------|----------|-------------|----------|
|             |          | 56          | 19.15    |
|             |          | 9           | 19.15    |
|             |          | 69          | 19.15    |
|             |          | 3           | 19.15    |
|             |          | 6           | 19.15    |
|             |          | 12          | 19.57    |
|             |          | 78          | 19.57    |
|             |          | 41          | 20.83    |
|             |          | 81          | 20.83    |
|             |          | 54          | 21.28    |
|             |          | 55          | 21.28    |
|             |          | 59          | 21.28    |
|             |          | 58          | 21.28    |
|             |          | 7           | 21.28    |
|             |          | 74          | 21.28    |
|             |          | 22          | 21.28    |
|             |          | 27          | 21.28    |
|             |          | 2           | 21.28    |
|             |          | 38          | 21.28    |
|             |          | 79          | 21.28    |
|             |          | 67          | 23.40    |
|             |          | 4           | 23.40    |
|             |          | 76          | 23.40    |
|             |          | 5           | 23.40    |
|             |          | 72          | 23.40    |
|             |          | 33          | 23.40    |
|             |          | 64          | 23.40    |
|             |          | 82          | 23.40    |
|             |          | 47          | 23.40    |
|             |          | 48          | 23.40    |
|             |          | 44          | 23.40    |
|             |          | 57          | 23.40    |
|             |          | 18          | 23.40    |
|             |          | 1           | 23.40    |
|             |          | 70          | 23.91    |
|             |          | 66          | 23.91    |
|             |          | 20          | 25.53    |
|             |          | 32          | 25.53    |
|             |          | 35          | 25.53    |
|             |          | 34          | 25.53    |
|             |          | 28          | 27.66    |
|             |          | 37          | 27.66    |
|             |          | 80          | 29.79    |

Table 6: Subject recognition accuracy as a function of gesture class, sorted by accuracy. This is the corresponding data for Figure 10

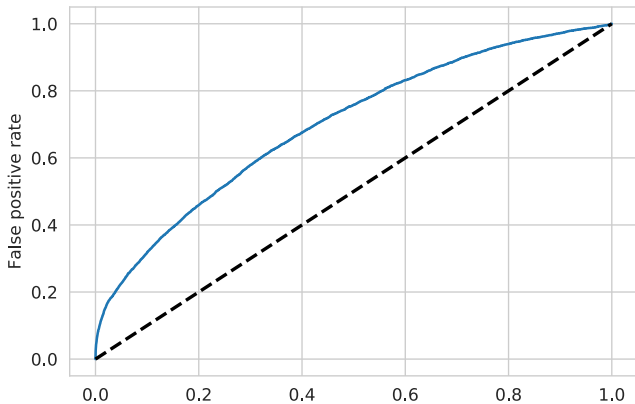

Figure 9: ROC curve for gesture-based user verification

### 6.2. Dataset Split for Subject Recognition for Unseen Gestures

We select the following gestures for training: 2, 4, 6, 8, 10, 12, 14, 16, 18, 20, 22, 24, 26, 28, 30, 32, 34, 36, 38, 40, 42, 44, 46, 48, 50, 52, 54, 56, 58, 60, 62, 64, 66, 68, 70, 72, 74, 76, 78, 80, and 82.

### 6.3. Dataset Split for Gesture Based Verification

We use 30 subjects for training, 10 for validation, and 10 for testing. The subjects for train is 3, 4, 5, 6, 8, 10, 15, 16, 17, 20, 21, 22, 23, 25, 26, 27, 30, 32, 36, 38, 39, 40, 42, 43, 44, 45, 46, 48, 49, and 50. The validation is 2, 9, 11, 14, 18, 19, 28, 31, 41, and 47. The testing is 1, 7, 12, 13, 24, 29, 33, 34, 35, and 37.

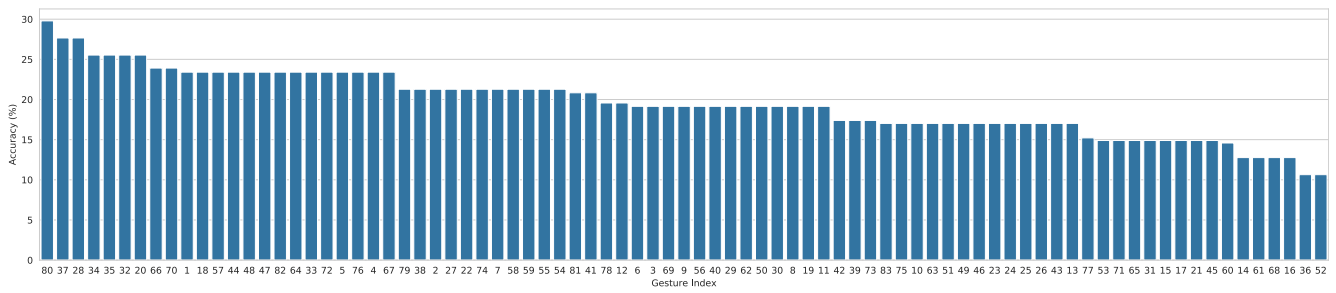

Figure 10: Subject recognition accuracy as a function of gesture class, sorted by accuracy. Some gestures allow subjects to be more easily recognized than others. Table in Supplementary Material shows the original data.
